# Supplementary material
Source: PubMed Central journal article supplement (PMC1798436)
Supplement: bj4020377add.pdf [file bj4020377add.pdf]

## **Supplementary Figures**

**Mousson de Camaret B, et al.**

### **Supplementary Figure 1. Genotype data**

**(A) *DGUOK* mutations in patient 1 and his family**

**(B) *DGUOK* mutations in patient 2**

**(C) *DGUOK* mutations in patient 3 and her parents**

### **Supplementary Figure 2. Skipping of exon 4 in patient 2**

**(A) Amplification and sequencing of exons 3-5 from patient 2**

**(B) Amplification of exons 4-5 from patient 2**

### **Supplementary Figure 3. Aminoacid interactions**

**(A) With wild-type N46 and mutant S46**

**(B) With wild-type L266 and mutant R266**

Supplementary Figure 1. Genotype data

(A) Sequencing of *DGUOK* gene. Detection of mutations in patient 1 and in his family

Patient  
exon 1: c.137A>G

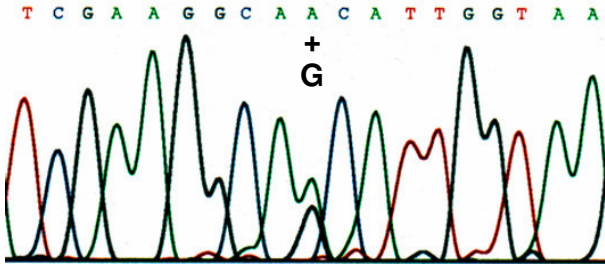

Patient  
exon 6: c.797T>G

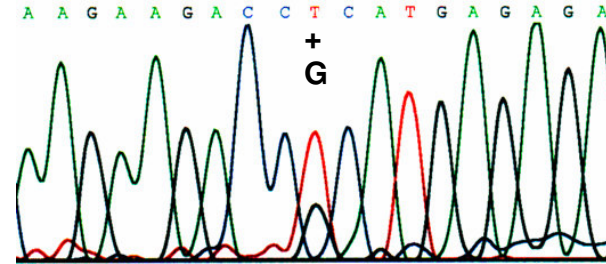

Mother and Brother  
exon 1: c.137A>G

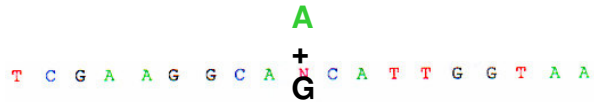

Mother

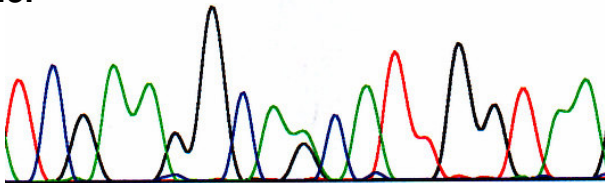

Brother

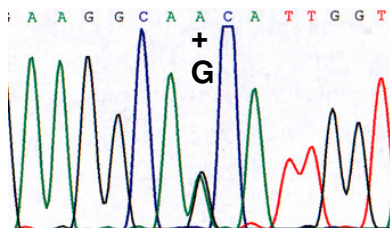

Father  
exon 6: c.797T>G

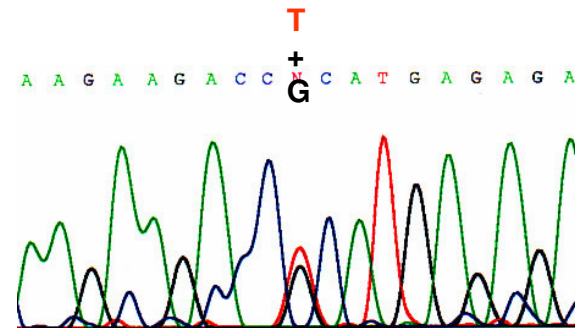

(B) Sequencing of *DGUOK* gene. Detection of mutations in patient 2

exon 1: c.4G>T (A2S)

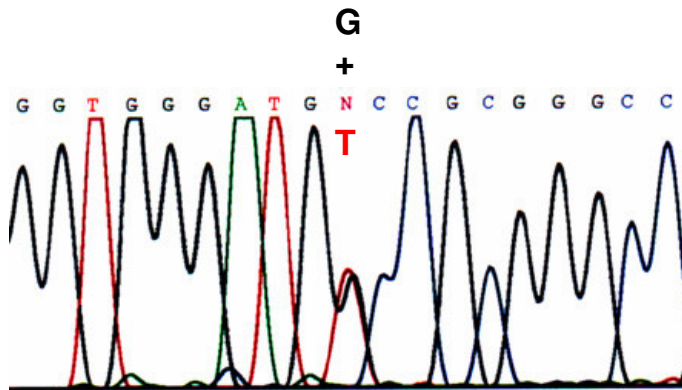

intron 1: c.142+1G>A

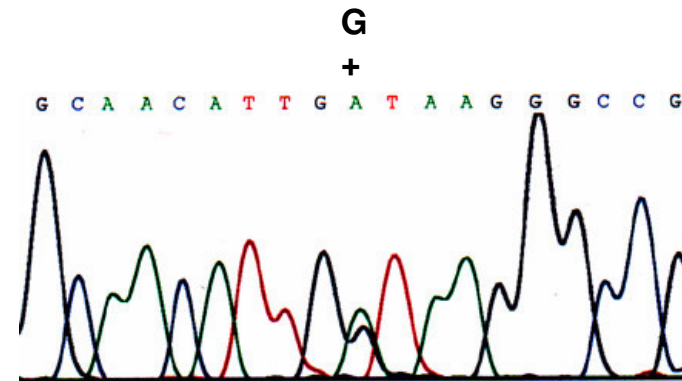

exon 4: c.591G>A

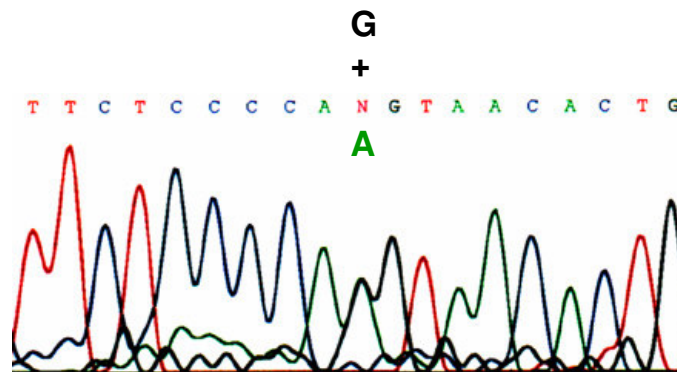

**(C) Sequencing of *DGUOK* gene. Detection of mutation in patient 3 and her parents**

**Patient**  
 exon 6: c.763\_766dupGATT

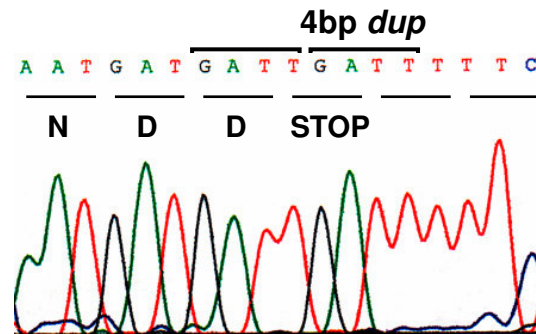

**Mother**

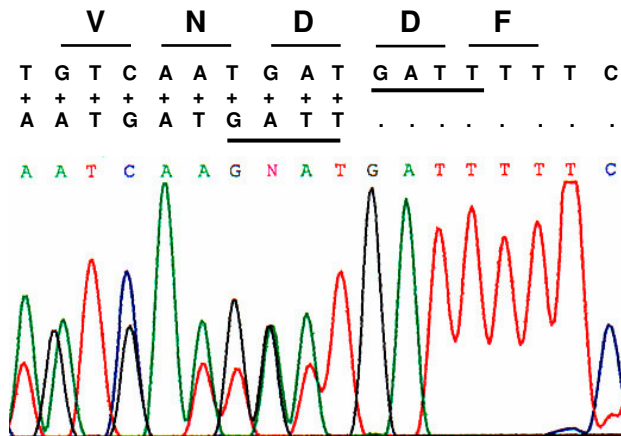

**Antisense sequencing**

Normal  
 sequence  
 Superimposed  
 sequence

**Father**

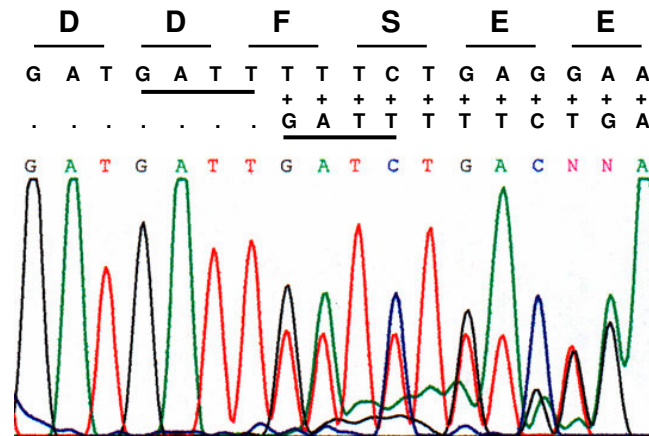

**Sense sequencing**

**Supplementary Figure 2. Skipping of exon 4 in patient 2**

**(A) Amplification and sequencing of exons 3-5 from patient 2**

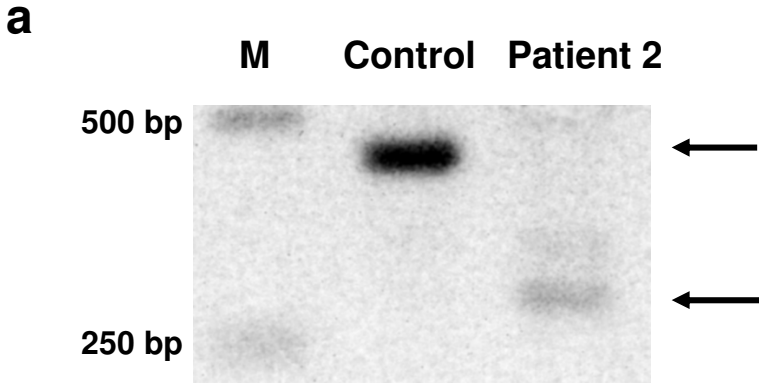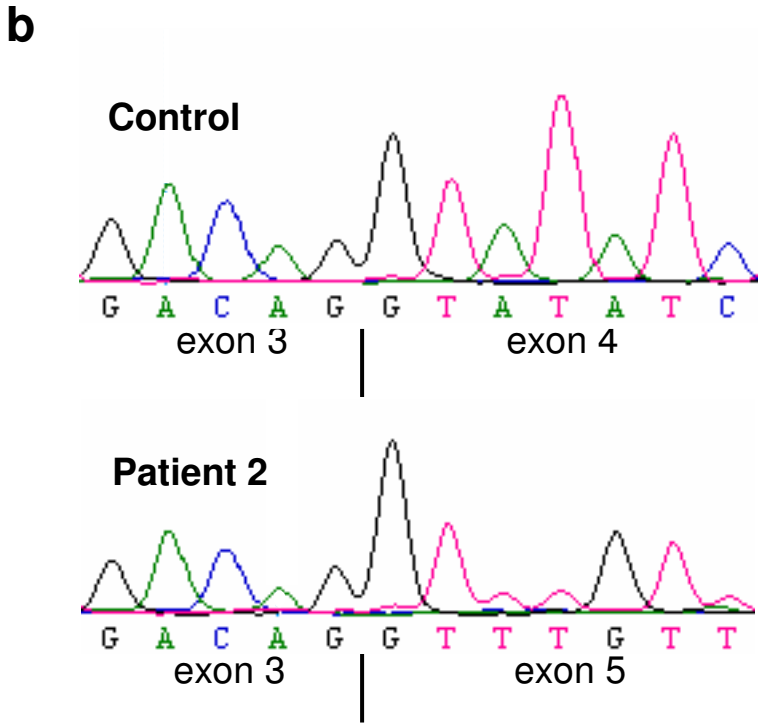

**(B) Amplification of exons 4-5 from patient 2**

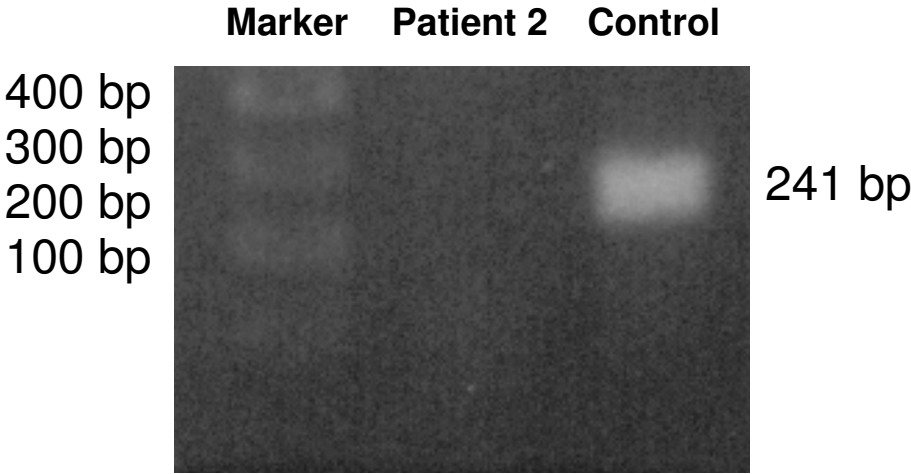

**Supplementary Figure 3. Aminoacid interactions  
(A) with wild-type N46 and mutant S46**

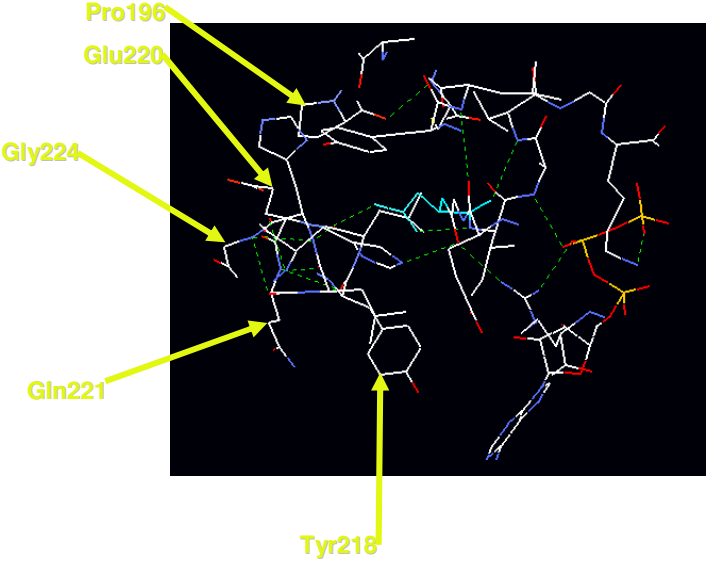

The amino acids in the vicinity of the **Asn 46 (N46)** residue

The amino acids in the vicinity of the **mutant Ser 46 (S46)** residue

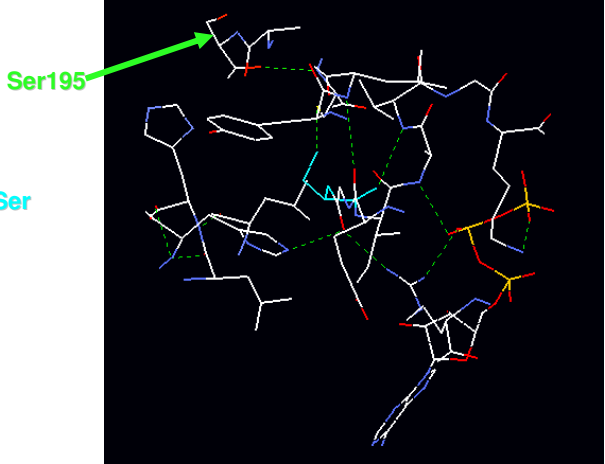

(B) with wild-type L266 and mutant R266

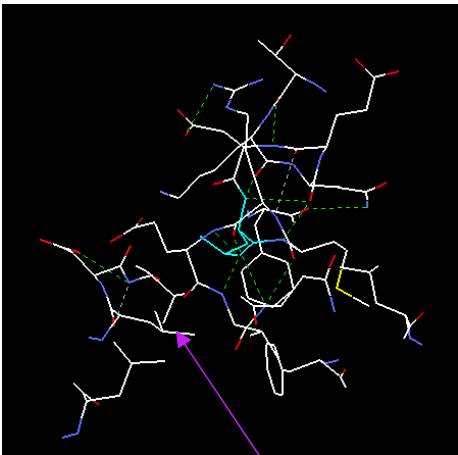

The amino acids in the vicinity of the **Leu266 (L266)** residue

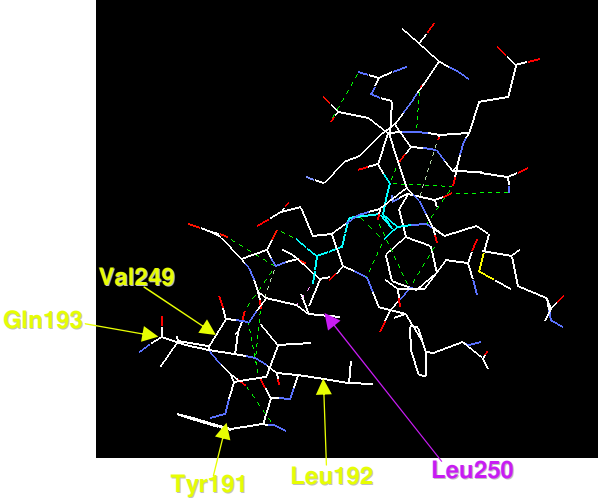

The amino acids in the vicinity of the **mutant Arg266 (R266)** residue
